# Supplementary material for: Characterization of a novel splicing mutation in UNC13D gene through amplicon sequencing: a case report on HLH
Source: Springer Nature journal article supplement (doi:10.1186/s12881-017-0489-1), 2017-11-21
Supplement: MOESM1 [file 15240716]

## Additional file

**Table S1.** Functional alteration prediction of two splicing mutations in UNC13D gene with HSF3.

| Mutation              | Predicted signal        | Prediction algorithm | cDNA Position                                                                      | Interpretation                                                                        |
|-----------------------|-------------------------|----------------------|------------------------------------------------------------------------------------|---------------------------------------------------------------------------------------|
| <b>c.2709+1G&gt;A</b> | Broken WT Donor Site    | 1 - HSF Matrices     | 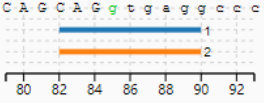 | Alteration of the WT donor site, most probably affecting splicing.                    |
|                       |                         | 2 - MaxEnt           |                                                                                    |                                                                                       |
| <b>c.1299-1G&gt;A</b> | Broken WT Acceptor Site | 1 - HSF Matrices     |  | Alteration of the WT acceptor site, most probably affecting splicing.                 |
|                       |                         | 2 - MaxEnt           |                                                                                    |                                                                                       |
|                       | New Acceptor Site       | 1 - HSF Matrices     |  | Activation of an intronic cryptic acceptor site.<br>Potential alteration of splicing. |
|                       |                         | 2 - MaxEnt           |                                                                                    |                                                                                       |
